# Supplementary material
Source: PubMed Central journal article supplement (PMC2533209)
Supplement: 0806974105_0806974105SI.pdf [file 0806974105_0806974105SI.pdf]

# Supporting Information

Fan *et al.* 10.1073/pnas.0806974105

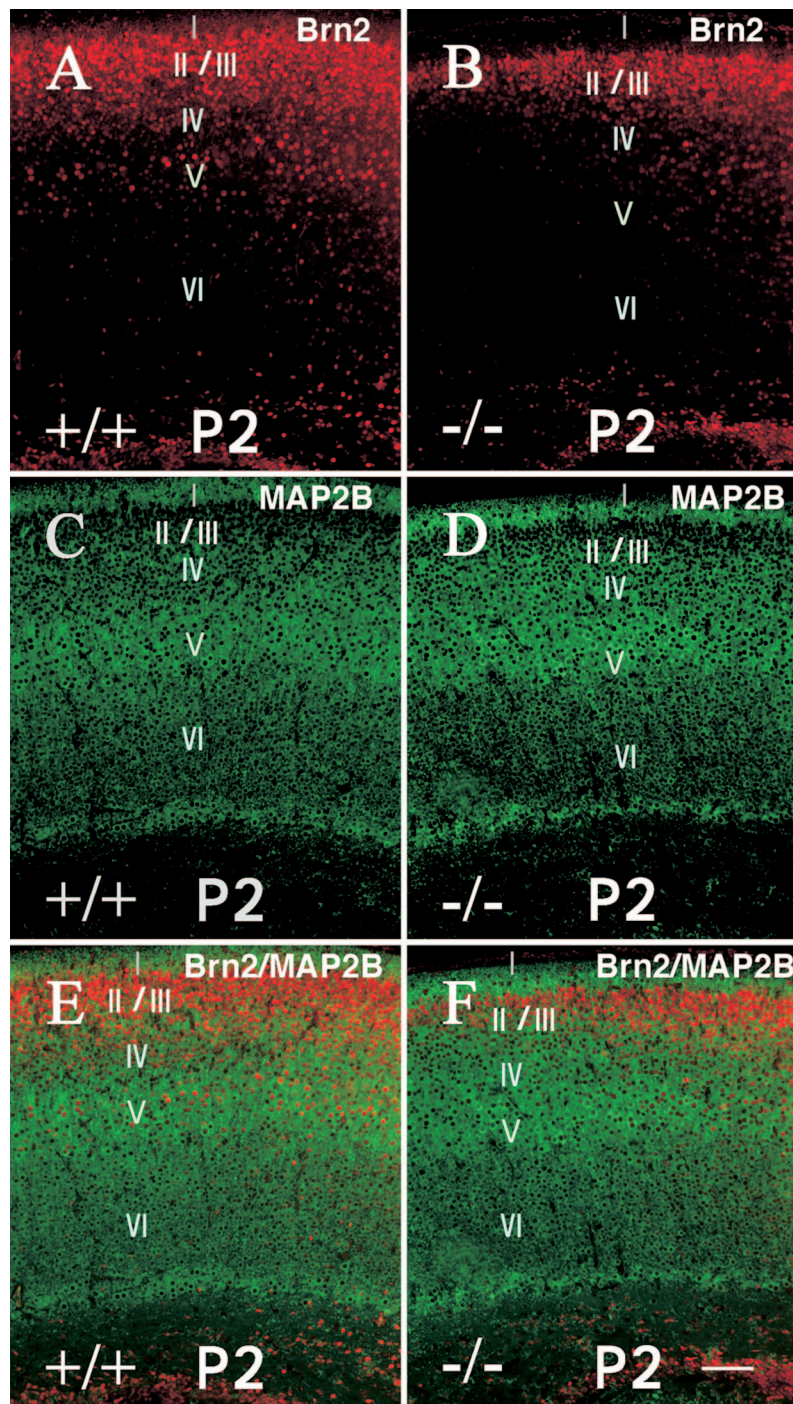

**Fig. S1.** Expression of MAP2B and Brn2 in the cerebral cortex of mice at P2. Compared with WT (A, C, and E) controls, specific reductions in layers II/III were observed in LXRβ<sup>-/-</sup> (B, D, and F) mice at P2. (Scale bar: 100 μm.)
